# Supplementary material for: Evaluation of Morpho-Physiological and Yield-Associated Traits of Rice (Oryza sativa L.) Landraces Combined with Marker-Assisted Selection under High-Temperature Stress and Elevated Atmospheric CO2 Levels
Source: MDPI journal article supplement (doi:10.3390/plants12203655), 2023-10-23
Supplement: s1 [file s1]

# Supplementary file

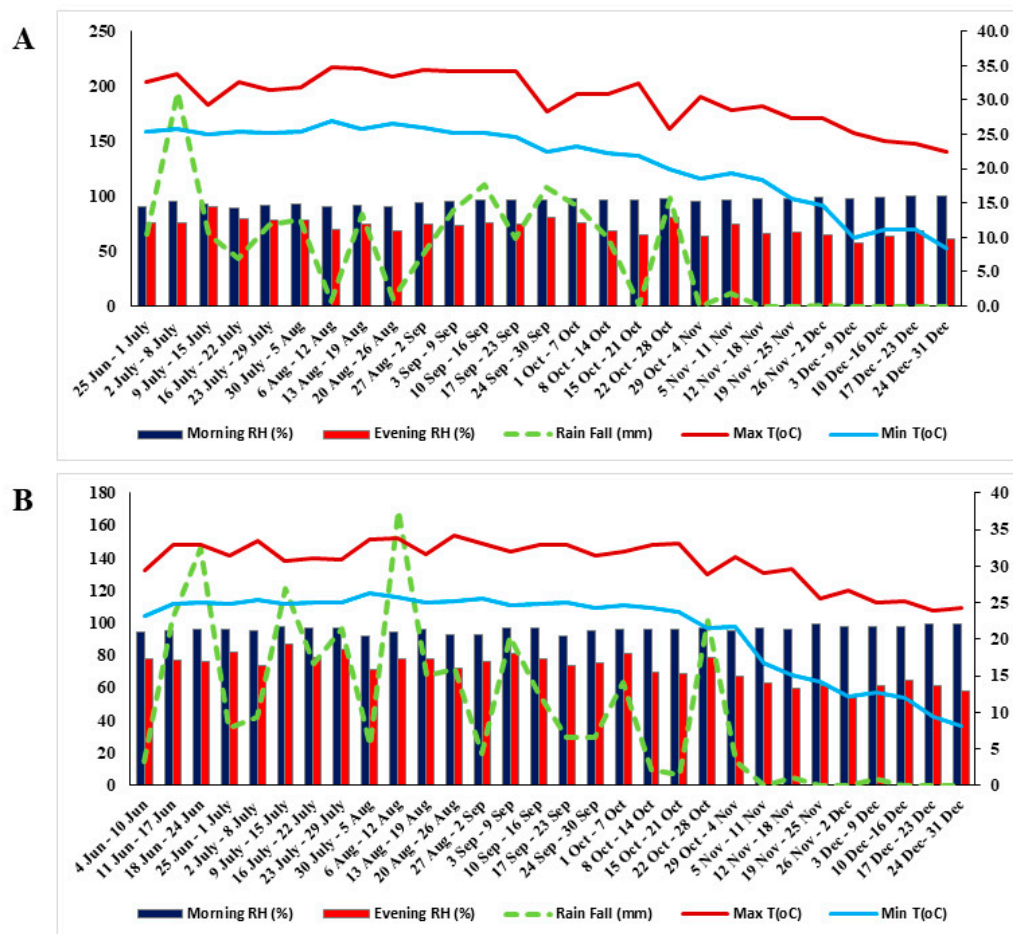

**Figure S1.** Meteorological data of maximum and minimum temperature (°C), total rainfall (mm), and relative humidity (RH%) in the morning and evening during the cropping seasons (A) Year-1 and (B) Year-2.

**Table S1.** Screening of rice landraces from North East India (Nagaland) under high temperature stress condition.

| Rice landraces  | Collection place of Nagaland | Days of healthiness | Days to leaf fold | Days to leaf rolling in to V shaped | Days to leaf margin (o shaped) | Days to leaf rolling (U shaped) | Days to leaf fully rolled | Days to slight tip drying | Days to tip drying extend to $\frac{1}{4}$ | Days to $\frac{1}{4}$ to $\frac{1}{5}$ of leaf fully dried | Days to more than $\frac{2}{3}$ rd of leaf fully dried | Days to plant die | Remarks |
|-----------------|------------------------------|---------------------|-------------------|-------------------------------------|--------------------------------|---------------------------------|---------------------------|---------------------------|--------------------------------------------|------------------------------------------------------------|--------------------------------------------------------|-------------------|---------|
| SARS-10         | Yisemyong                    | 2                   | 3                 | 4                                   | 6                              | 7                               | 9                         | 18                        | 20                                         | 21                                                         | 22                                                     | 23                | ST      |
| Tsukmerem       | Yisemyong                    | 3                   | 5                 | 7                                   | 9                              | 10                              | 12                        | 18                        | 20                                         | 22                                                         | 24                                                     | 25                | MT      |
| SARS-3          | Yisemyong                    | 4                   | 7                 | 9                                   | 11                             | 12                              | 14                        | 18                        | 17                                         | 20                                                         | 21                                                     | 22                | ST      |
| Masutsuk        | Yisemyong                    | 3                   | 5                 | 7                                   | 9                              | 11                              | 13                        | 18                        | 20                                         | 22                                                         | 24                                                     | 25                | MT      |
| Nailongmapok    | Yisemyong                    | 2                   | 3                 | 4                                   | 6                              | 7                               | 9                         | 18                        | 20                                         | 22                                                         | 23                                                     | 24                | ST      |
| Longsatsuk      | Yisemyong                    | 2                   | 3                 | 4                                   | 6                              | 7                               | 9                         | 18                        | 20                                         | 21                                                         | 22                                                     | 23                | ST      |
| Tangmatsuk      | Yisemyong                    | 2                   | 3                 | 4                                   | 5                              | 7                               | 8                         | 15                        | 18                                         | 20                                                         | 21                                                     | 22                | ST      |
| Koyatsuk        | Yisemyong                    | 2                   | 3                 | 4                                   | 6                              | 7                               | 9                         | 18                        | 20                                         | 21                                                         | 22                                                     | 23                | ST      |
| Chakpamapok     | Yisemyong                    | 3                   | 5                 | 7                                   | 9                              | 10                              | 12                        | 18                        | 20                                         | 22                                                         | 24                                                     | 25                | MT      |
| Manentsuk       | Yisemyong                    | 2                   | 4                 | 6                                   | 9                              | 11                              | 14                        | 20                        | 22                                         | 24                                                         | 26                                                     | 28                | MT      |
| Tsuknak         | Yisemyong                    | 5                   | 7                 | 8                                   | 13                             | 15                              | 17                        | 18                        | 20                                         | 22                                                         | 24                                                     | 30                | HT      |
| Tsulotsuk       | Yisemyong                    | 2                   | 4                 | 6                                   | 9                              | 11                              | 14                        | 20                        | 22                                         | 24                                                         | 26                                                     | 28                | MT      |
| Lisemtsuk       | Mepongchuket                 | 2                   | 4                 | 6                                   | 9                              | 11                              | 14                        | 20                        | 22                                         | 24                                                         | 28                                                     | 34                | HT      |
| Phomtsuk        | Yisemyong                    | 5                   | 7                 | 8                                   | 13                             | 15                              | 17                        | 18                        | 20                                         | 22                                                         | 24                                                     | 28                | MT      |
| Mopoklongjang   | Mepongchuket                 | 2                   | 4                 | 6                                   | 9                              | 11                              | 14                        | 20                        | 22                                         | 24                                                         | 26                                                     | 28                | MT      |
| Longkongtsuk    | Mepongchuket                 | 2                   | 4                 | 6                                   | 9                              | 11                              | 14                        | 20                        | 22                                         | 24                                                         | 26                                                     | 28                | MT      |
| SARS-7          | Yisemyong                    | 5                   | 7                 | 8                                   | 13                             | 15                              | 17                        | 18                        | 20                                         | 22                                                         | 24                                                     | 30                | HT      |
| Teke            | Yisemyong                    | 2                   | 4                 | 6                                   | 9                              | 11                              | 14                        | 20                        | 22                                         | 24                                                         | 26                                                     | 28                | MT      |
| SARS-8          | Yisemyong                    | 2                   | 4                 | 6                                   | 9                              | 11                              | 14                        | 20                        | 22                                         | 24                                                         | 26                                                     | 28                | MT      |
| SARS-9          | Yisemyong                    | 5                   | 7                 | 8                                   | 13                             | 15                              | 17                        | 18                        | 20                                         | 22                                                         | 24                                                     | 31                | HT      |
| Lisemtsuk 1     | Mepongchuket                 | 2                   | 4                 | 6                                   | 9                              | 11                              | 14                        | 20                        | 22                                         | 24                                                         | 26                                                     | 28                | MT      |
| SARS-11         | Yisemyong                    | 2                   | 4                 | 6                                   | 9                              | 11                              | 14                        | 20                        | 22                                         | 24                                                         | 26                                                     | 28                | MT      |
| SARS-6          | Yisemyong                    | 5                   | 7                 | 8                                   | 13                             | 15                              | 17                        | 18                        | 20                                         | 22                                                         | 24                                                     | 32                | HT      |
| Yam             | Mon                          | 2                   | 4                 | 6                                   | 9                              | 11                              | 14                        | 20                        | 22                                         | 24                                                         | 26                                                     | 28                | MT      |
| Chapanga        | Mon                          | 2                   | 4                 | 6                                   | 9                              | 11                              | 14                        | 20                        | 22                                         | 24                                                         | 26                                                     | 28                | MT      |
| Chakad          | Mon                          | 5                   | 7                 | 8                                   | 13                             | 15                              | 17                        | 18                        | 20                                         | 22                                                         | 24                                                     | 32                | HT      |
| Gotzang         | Mon                          | 2                   | 4                 | 6                                   | 9                              | 11                              | 14                        | 20                        | 22                                         | 24                                                         | 26                                                     | 28                | MT      |
| Kaladhan        | Mon                          | 2                   | 4                 | 6                                   | 9                              | 11                              | 14                        | 20                        | 22                                         | 24                                                         | 26                                                     | 28                | MT      |
| Khadhu          | Mon                          | 5                   | 7                 | 8                                   | 13                             | 15                              | 17                        | 18                        | 20                                         | 22                                                         | 24                                                     | 28                | HT      |
| Wam             | Mon                          | 2                   | 4                 | 6                                   | 9                              | 11                              | 14                        | 20                        | 22                                         | 24                                                         | 26                                                     | 28                | MT      |
| Mapokmerangkong | Merengkong                   | 2                   | 4                 | 6                                   | 9                              | 11                              | 14                        | 20                        | 22                                         | 24                                                         | 26                                                     | 28                | MT      |
| Temeremmapok    | Mupongchuket                 | 2                   | 4                 | 6                                   | 9                              | 11                              | 14                        | 20                        | 22                                         | 24                                                         | 26                                                     | 28                | MT      |
| Tsukmesung      | Mupongchuket                 | 5                   | 7                 | 8                                   | 13                             | 15                              | 17                        | 18                        | 20                                         | 22                                                         | 24                                                     | 32                | HT      |
| Temeremtsuk     | Mupongchuket                 | 2                   | 4                 | 6                                   | 9                              | 11                              | 14                        | 20                        | 22                                         | 24                                                         | 26                                                     | 28                | MT      |
| Temesungtsuk    | Mupongchuket                 | 2                   | 4                 | 6                                   | 9                              | 11                              | 14                        | 20                        | 22                                         | 24                                                         | 26                                                     | 28                | MT      |
| Ahari           | Jharnapani                   | 5                   | 7                 | 8                                   | 13                             | 15                              | 17                        | 18                        | 20                                         | 22                                                         | 24                                                     | 31                | HT      |
| Sceiti          | Jharnapani                   | 2                   | 4                 | 6                                   | 9                              | 11                              | 14                        | 20                        | 22                                         | 24                                                         | 26                                                     | 29                | MT      |
| Nldspl 1        | Jharnapani                   | 2                   | 4                 | 6                                   | 9                              | 11                              | 14                        | 20                        | 22                                         | 24                                                         | 26                                                     | 30                | MT      |
| Kohima special  | Jharnapani                   | 5                   | 7                 | 8                                   | 13                             | 15                              | 17                        | 18                        | 20                                         | 24                                                         | 26                                                     | 35                | HT      |
| Baiti           | Punglao                      | 4                   | 6                 | 9                                   | 11                             | 13                              | 15                        | 20                        | 22                                         | 24                                                         | 26                                                     | 28                | MT      |
| Tatza           | Punglao                      | 7                   | 12                | 15                                  | 18                             | 21                              | 24                        | 28                        | 29                                         | 30                                                         | 32                                                     | 34                | HT      |
| Gluthpunglaw    | Punglao                      | 2                   | 3                 | 4                                   | 6                              | 7                               | 9                         | 12                        | 13                                         | 15                                                         | 17                                                     | 19                | ST      |
| Joha            | Medziphema                   | 3                   | 5                 | 7                                   | 9                              | 10                              | 11                        | 18                        | 20                                         | 22                                                         | 24                                                     | 25                | MT      |
| Tzumma          | Medziphema                   | 4                   | 6                 | 9                                   | 11                             | 13                              | 15                        | 20                        | 22                                         | 26                                                         | 28                                                     | 33                | HT      |

|               |              |   |    |    |    |    |    |    |    |    |    |    |    |
|---------------|--------------|---|----|----|----|----|----|----|----|----|----|----|----|
| Manipurspl    | Tizit        | 2 | 4  | 6  | 8  | 10 | 12 | 16 | 18 | 20 | 21 | 24 | MT |
| Kamkum        | Tizit        | 4 | 6  | 9  | 11 | 13 | 15 | 20 | 22 | 24 | 26 | 28 | MT |
| Burdhan       | Tizit        | 7 | 12 | 15 | 18 | 18 | 22 | 26 | 27 | 27 | 28 | 31 | MT |
| Hatau         | Sangsa       | 2 | 3  | 4  | 6  | 7  | 9  | 12 | 13 | 15 | 17 | 19 | ST |
| Phusa         | Aboi         | 3 | 5  | 7  | 9  | 10 | 11 | 18 | 20 | 22 | 24 | 25 | MT |
| Thanyu        | Mon          | 4 | 6  | 9  | 11 | 13 | 15 | 20 | 22 | 24 | 26 | 28 | MT |
| Yamshang      | Aboi         | 2 | 4  | 6  | 8  | 10 | 12 | 16 | 18 | 20 | 21 | 24 | ST |
| Phula         | Aboi         | 4 | 6  | 9  | 11 | 13 | 15 | 20 | 22 | 24 | 26 | 28 | MT |
| Wangsho       | Aboi         | 7 | 12 | 15 | 18 | 21 | 24 | 25 | 26 | 28 | 29 | 31 | HT |
| Manen 1       | Mongchen     | 2 | 3  | 4  | 6  | 7  | 9  | 12 | 13 | 15 | 17 | 19 | ST |
| Manen 2       | Mongchen     | 3 | 5  | 7  | 9  | 10 | 11 | 18 | 20 | 22 | 24 | 25 | MT |
| Manen 3       | Mongchen     | 4 | 6  | 9  | 11 | 13 | 15 | 20 | 22 | 23 | 25 | 26 | MT |
| Lisemtsuk 1   | Mongchen     | 2 | 4  | 6  | 8  | 10 | 12 | 16 | 20 | 24 | 28 | 31 | HT |
| Nld spl2      | Medziphema   | 4 | 6  | 9  | 11 | 13 | 15 | 20 | 22 | 26 | 28 | 31 | HT |
| Kaladhan      | Jharnapani   | 7 | 12 | 15 | 18 | 21 | 24 | 28 | 29 | 30 | 32 | 35 | HT |
| Nldspl        | Jharnapani   | 7 | 12 | 15 | 18 | 21 | 24 | 25 | 26 | 28 | 29 | 31 | HT |
| Masu 1        | Mongchen     | 3 | 5  | 7  | 9  | 10 | 11 | 18 | 20 | 22 | 24 | 25 | MT |
| Masu 2        | Mongchen     | 4 | 6  | 9  | 11 | 13 | 15 | 20 | 22 | 24 | 26 | 28 | MT |
| Masu 3        | Mongchen     | 2 | 4  | 6  | 8  | 10 | 12 | 16 | 18 | 20 | 21 | 24 | ST |
| Lisemtsuk 2   | Mongchen     | 7 | 12 | 15 | 18 | 21 | 24 | 28 | 29 | 30 | 32 | 33 | HT |
| Mapoktemeseng | Merangkong   | 7 | 12 | 15 | 18 | 21 | 24 | 28 | 29 | 30 | 32 | 35 | HT |
| Masutsuk 1    | Merangkong   | 2 | 3  | 4  | 6  | 7  | 9  | 12 | 13 | 15 | 17 | 19 | ST |
| Tsukmerem     | Merangkong   | 3 | 5  | 7  | 9  | 10 | 11 | 18 | 20 | 22 | 24 | 25 | MT |
| Temesungtsuk  | Merangkong   | 4 | 6  | 9  | 11 | 13 | 15 | 20 | 22 | 24 | 26 | 28 | MT |
| Changtah      | Mon          | 2 | 4  | 6  | 8  | 10 | 12 | 16 | 18 | 20 | 21 | 24 | MT |
| Phuaha        | Mon          | 4 | 6  | 9  | 11 | 13 | 15 | 20 | 22 | 24 | 26 | 28 | MT |
| Humo          | Molva        | 7 | 12 | 15 | 18 | 21 | 24 | 28 | 29 | 30 | 32 | 33 | HT |
| Khaja         | Molva        | 2 | 3  | 4  | 6  | 7  | 9  | 12 | 13 | 15 | 17 | 19 | ST |
| Bermol        | Molva        | 3 | 5  | 7  | 9  | 10 | 11 | 18 | 20 | 22 | 24 | 25 | MT |
| Laldhan       | Molva        | 4 | 6  | 9  | 11 | 15 | 20 | 22 | 24 | 26 | 28 | 34 | HT |
| Mujangka      | Longpayimsen | 2 | 4  | 6  | 8  | 10 | 12 | 16 | 18 | 23 | 25 | 29 | MT |

HT - Highly tolerant = Plants were survived more than 30 days;

MT – Moderate tolerant = Plants were survived 25-30 days;

ST - Susceptible = Plants were died within 20 days;

**Table S2.** Details of used SCoT primers and their sequences, GC content and melting temperature (T<sub>m</sub>).

| Sl. No. | Primers | Sequences (5-3)    | GC content (%) | T <sub>m</sub> (°C) |
|---------|---------|--------------------|----------------|---------------------|
| 1.      | SCoT2   | CAACAATGGCTACAACCC | 55.6           | 53.6                |
| 2.      | SCoT5   | CAACAATGGCTACCACGA | 50.0           | 52.6                |
| 3.      | SCoT6   | CAACAATGGCTACCACGC | 55.6           | 54.4                |
| 4.      | SCoT8   | CAACAATGGCTACCACGT | 50.0           | 52.9                |
| 5.      | SCoT9   | CAACAATGGCTACCAGCA | 50.0           | 52.9                |
| 6.      | SCoT15  | ACGACATGGCGACCGCGA | 67.0           | 59.0                |
| 7.      | SCoT16  | ACCATGGCTACCACCGAC | 56.0           | 60.7                |
| 8.      | SCoT17  | ACCATGGCTACCACCGAG | 67.0           | 59.0                |
| 9.      | SCoT18  | ACCATGGCTACCACCGCC | 67.0           | 59.0                |
| 10.     | SCoT19  | ACCATGGCTACCACCGGC | 66.7           | 60.7                |
| 11.     | SCoT20  | ACCATGGCTACCACCGCG | 66.7           | 58.3                |
| 12.     | SCoT21  | ACGACATGGCGACCCACA | 61.0           | 57.0                |
| 13.     | SCoT22  | AACCATGGCTACCACCAC | 56.0           | 55.0                |
| 14.     | SCoT24  | CACCATGGCTACCACCAT | 61.2           | 57.0                |
| 15.     | SCoT26  | ACCATGGCTACCACCGTC | 61.1           | 57.3                |
| 16.     | SCoT27  | ACCATGGCTACCACCGTG | 61.0           | 57.0                |
| 17.     | SCoT28  | CCATGGCTACCACCGCCA | 66.7           | 60.7                |
| 18.     | SCoT29  | CCATGGCTACCACCGGCC | 72.0           | 61.5                |
| 19.     | SCoT30  | CCATGGCTACCACCGGCG | 72.2           | 61.8                |
| 20.     | SCoT31  | CCATGGCTACCACCGCCT | 66.7           | 60.4                |
| 21.     | SCoT32  | CCATGGCTACCACCGCAC | 66.7           | 59.1                |
| 22.     | SCoT33  | CCATGGCTACCACCGCAG | 66.7           | 58.3                |
| 23.     | SCoT34  | ACCATGGCTACCACCGCA | 61.0           | 57.2                |
| 24.     | SCoT35  | CATGGCTACCACCGGCCC | 72.2           | 61.7                |
| 25.     | SCoT36  | GCAACAATGGCTACCACC | 55.6           | 54.2                |
